# Supplementary material for: Multiplex Bioanalytical Methods for Comprehensive Characterization and Quantification of the Unique Complementarity-Determining-Region Deamidation of MEDI7247, an Anti-ASCT2 Pyrrolobenzodiazepine Antibody–Drug Conjugate
Source: MDPI journal article supplement (doi:10.3390/antib12040066), 2023-10-17

## Supporting Information

# Multiplex Bioanalytical Methods for Comprehensive Characterization and Quantification of the Unique Complementarity-Determining-Region Deamidation of MEDI7247, an Anti-ASCT2 Pyrrolobenzodiazepine Antibody–Drug Conjugate

Yue Huang <sup>1</sup>, Jiaqi Yuan <sup>1</sup>, Ruipeng Mu <sup>1</sup>, Robert J. Kubiak <sup>2</sup>, Kathryn Ball <sup>3</sup>, Mingyan Cao <sup>4</sup>, G. Patrick Hussmann <sup>4</sup>, Niluka de Mel <sup>4</sup>, Dengfeng Liu <sup>4</sup>, Lorin K. Roskos <sup>2</sup>, Meina Liang <sup>1</sup> and Anton I. Rosenbaum <sup>1,\*</sup>

- <sup>1</sup> Integrated Bioanalysis, Clinical Pharmacology & Safety Sciences, R&D, AstraZeneca, 121 Oyster Point Boulevard, South San Francisco, CA 94080, USA; yue.huang@astrazeneca.com (Y.H.); jiaqi.yuan1@astrazeneca.com (J.Y.); rmu@arcusbio.com (R.M.); meina.liang@amadorbio.com (M.L.)
  - <sup>2</sup> Clinical Pharmacology and Quantitative Pharmacology, Clinical Pharmacology & Safety Sciences, R&D, AstraZeneca, One MedImmune Way, Gaithersburg, MD 20878, USA; robert.kubiak@astrazeneca.com (R.J.K.); lorin.roskos@amadorbio.com (L.K.R.)
  - <sup>3</sup> Clinical Pharmacology and Quantitative Pharmacology, Clinical Pharmacology & Safety Sciences, R&D, AstraZeneca, Granta Park, Cambridge, CB21 6GH, UK; kathryn.ball@astrazeneca.com
  - <sup>4</sup> Department of Analytical Sciences, Biopharmaceutical Development, R&D, AstraZeneca, One MedImmune Way, Gaithersburg, MD 20878, USA; mingyan.x.cao@gsk.com (M.C.); patrick.hussmann@astrazeneca.com (G.P.H.); niluka.demel@astrazeneca.com (N.d.M.); dengfeng.liu.work@gmail.com (D.L.)
- \* Correspondence: anton.rosenbaum@astrazeneca.com

Table S1. Mass spectrometer parameters for 1) the total Ab, 2) non-deamidated Ab and 3) MEDI7247 ADC assay. The deamidated antibody is qualitatively monitored.

| Method Index    | MRM Index | Analyte Name   | Fragment Ion | Q1      | Q3       | dwell time (msec) | DP  | CE | Used in Absolute Quantification |
|-----------------|-----------|----------------|--------------|---------|----------|-------------------|-----|----|---------------------------------|
| 1<br>Total Ab   | 1         | HC-CDR_GLEW    | y18-2+       | 760.832 | 991.089  | 20                | 135 | 30 |                                 |
|                 | 2         |                | y16-2+       | 760.832 | 841.402  | 20                | 135 | 30 | Y                               |
|                 | 3         | HC-CDR_GLEW_IS | y18-2+       | 763.499 | 995.089  | 20                | 135 | 30 |                                 |
|                 | 4         |                | y16-2+       | 763.499 | 845.402  | 20                | 135 | 30 | Y                               |
| 2<br>Non-de. Ab | 5         | HC-CDR_NWHY    | b9+          | 943.010 | 1305.347 | 30                | 135 | 42 | Y                               |
|                 | 6         |                | y8+          | 943.010 | 780.853  | 30                | 135 | 42 |                                 |
|                 | 7         |                | y12+         | 943.010 | 1151.302 | 30                | 135 | 42 |                                 |
|                 | 8         | HC-CDR_NWHY_IS | b9+          | 945.677 | 1305.347 | 30                | 135 | 42 | Y                               |
|                 | 9         |                | y8+          | 945.677 | 788.853  | 30                | 135 | 42 |                                 |

|             |    |                    |      |         |          |     |     |    |   |
|-------------|----|--------------------|------|---------|----------|-----|-----|----|---|
|             | 10 |                    | y12+ | 945.677 | 1159.302 | 30  | 135 | 42 |   |
| * De.<br>Ab | 11 | HC-CDR_GQGK        | y9+  | 800.356 | 879.985  | 30  | 135 | 35 |   |
|             | 12 |                    | y8+  | 800.356 | 780.853  | 30  | 135 | 35 |   |
|             | 13 | HC-<br>CDR_GQGK_IS | y9+  | 802.356 | 887.985  | 30  | 135 | 35 |   |
|             | 14 |                    | y8+  | 802.356 | 788.853  | 30  | 135 | 35 |   |
| 3<br>ADC    | 15 | SG3199             | n/a  | 585.3   | 504.3    | 200 | 85  | 31 | Y |
|             | 16 | SG3199_IS          | n/a  | 595.3   | 514.3    | 200 | 85  | 31 | Y |

MRM: multiple reaction monitoring; Q1: quadrupole 1 parent ion m/z; Q3: quadrupole 3 fragment ion m/z; DP: declustering potential; CE: collision energy; m/z: mass over charge ratio; HC: heavy chain; CDR: complementarity determining region; IS: internal standard.

Table S2. Chromatographic Gradient for the total Ab and non-deamidated Ab assay.

| Time | MPB% |
|------|------|
| 0.01 | 15   |
| 0.2  | 20   |
| 4    | 26.5 |
| 4.2  | 98   |
| 4.7  | 98   |
| 5    | 15   |
| 5.5  | 15   |

Table S3. Selectivity of the multiplex assay with the spiked in LLOQ of 6 individual plasma lots.

|                   | Individual 1 | Individual 2 | Individual 3 | Individual 4 | Individual 5 | Individual 6 |
|-------------------|--------------|--------------|--------------|--------------|--------------|--------------|
| MEDI7247 ADC      |              |              |              |              |              |              |
| Rep1              | 84.43        | 79.98        | 150.51       | 97.77        | 79.94        | 105.91       |
| Rep2              | 96.98        | 104.94       | 121.16       | 93.81        | 136.33       | 106.76       |
| Rep3              | 98.39        | 104.81       | 133.42       | 114.89       | 104.93       | 115.11       |
| pass/total        | 3/3          | 3/3          | 1/3          | 3/3          | 2/3          | 3/3          |
| pass/fail         | pass         | pass         | fail         | pass         | pass         | pass         |
| Total Ab          |              |              |              |              |              |              |
| Rep1              | 93.77        | 92.96        | 102.23       | 127.48       | 101.35       | 135.87       |
| Rep2              | 102.01       | 88.13        | 91.5         | 119.9        | 112.4        | 118.97       |
| Rep3              | 93.17        | 143.12       | 96.09        | 102.17       | 136.49       | 132.95       |
| pass/total        | 3/3          | 2/3          | 3/3          | 2/3          | 2/3          | 1/3          |
| pass/fail         | pass         | pass         | pass         | pass         | pass         | fail         |
| Non-Deamidated Ab |              |              |              |              |              |              |
| Rep1              | 102.94       | 86.23        | 93.85        | 138.34       | 83.25        | 98.2         |
| Rep2              | 93.07        | 98.28        | 78.76        | 86.61        | 129.05       | 105.95       |
| Rep3              | 125.06       | 97.73        | 89.43        | 112.84       | 115.7        | 104.5        |
| pass/total        | 3/3          | 3/3          | 3/3          | 2/3          | 2/3          | 3/3          |
| pass/fail         | pass         | pass         | pass         | pass         | pass         | pass         |

Table S4. Individual patient PK parameters calculated from ADC assay, non-deamidated (non-de.) Ab assay and total Ab assay.

| Analyte        | Patient ID | AUCinf<br>h*ng/mL | AUClast<br>h*ng/mL | CL<br>mL/h/kg | Cmax<br>ng/mL | Half-life<br>h | Vss<br>mL/kg |
|----------------|------------|-------------------|--------------------|---------------|---------------|----------------|--------------|
| ADC            | Patient 01 | 43700             | 38300              | 2.75          | 1150          | 56.0           | 199          |
|                | Patient 02 | 35500             | 29500              | 3.38          | 953           | 67.3           | 297          |
|                | Patient 03 | 44400             | 35900              | 2.70          | 1130          | 62.8           | 221          |
|                | Patient 04 | 26800             | 20200              | 4.47          | 669           | 65.9           | 421          |
|                | Patient 05 | 42800             | 36700              | 2.81          | 1280          | 72.5           | 245          |
|                | Patient 06 | 39100             | 34100              | 3.07          | 1450          | 59.6           | 224          |
|                | Patient 07 | 44300             | 38400              | 2.71          | 1090          | 59.3           | 207          |
|                | Patient 08 | 32600             | 30900              | 3.68          | 1400          | 47.0           | 204          |
|                | Patient 09 | 25100             | 23500              | 4.78          | 1040          | 43.2           | 250          |
|                | Patient 10 | 12700             | 12400              | 9.41          | 740           | 10.3           | 150          |
|                | Patient 11 | 49700             | 48300              | 2.42          | 1830          | 38.7           | 111          |
| N              |            | 11                | 11                 | 11            | 11            | 11             | 11           |
| Mean           |            | 36100             | 31700              | 3.84          | 1160          | 53.0           | 230          |
| SD             |            | 10900             | 9940               | 2.00          | 329           | 17.6           | 80.2         |
| CV%            |            | 30.3              | 31.4               | 52.2          | 28.4          | 33.2           | 34.9         |
| Median         |            | 39100             | 34100              | 3.07          | 1130          | 59.3           | 221          |
| Range          |            | 36900             | 35900              | 7.00          | 1160          | 62.2           | 310          |
| Geometric Mean |            | 34000             | 29900              | 3.53          | 1110          | 48.2           | 218          |
|                |            |                   |                    |               |               |                |              |
| Analyte        | Patient ID | AUCinf<br>h*ng/mL | AUClast<br>h*ng/mL | CL<br>mL/h/kg | Cmax<br>ng/mL | Half-life<br>h | Vss<br>mL/kg |
| Non-de.<br>Ab  | Patient 01 | 25100             | 23500              | 4.77          | 1320          | 44.9           | 239          |
|                | Patient 02 | 22400             | 20600              | 5.36          | 1230          | 50.3           | 314          |
|                | Patient 03 | 41300             | 32300              | 2.91          | 1260          | 69.8           | 258          |
|                | Patient 04 | 13200             | 11300              | 9.11          | 625           | 52.0           | 602          |
|                | Patient 05 | 29700             | 27700              | 4.05          | 1410          | 53.2           | 225          |
|                | Patient 06 | 26100             | 24400              | 4.59          | 1590          | 46.3           | 244          |
|                | Patient 07 | 42100             | 31600              | 2.85          | 993           | 87.3           | 322          |
|                | Patient 08 | 29600             | 27800              | 4.05          | 1480          | 49.2           | 225          |
|                | Patient 09 | 19200             | 17200              | 6.26          | 1040          | 54.9           | 397          |
|                | Patient 10 | 9330              | 8930               | 12.9          | 961           | 11.2           | 198          |
|                | Patient 11 | 40400             | 38800              | 2.97          | 2070          | 42.6           | 138          |
| N              |            | 11                | 11                 | 11            | 11            | 11             | 11           |
| Mean           |            | 27100             | 24000              | 5.44          | 1270          | 51.1           | 287          |
| SD             |            | 11000             | 9070               | 3.06          | 381           | 18.5           | 125          |
| CV%            |            | 40.6              | 37.8               | 56.2          | 30.0          | 36.1           | 43.4         |
| Median         |            | 26100             | 24400              | 4.59          | 1260          | 50.3           | 244          |
| Range          |            | 32800             | 29900              | 10.0          | 1440          | 76.1           | 464          |
| Geometric Mean |            | 24700             | 22100              | 4.85          | 1220          | 46.7           | 268          |

| Analyte        | Patient ID | AUC <sub>inf</sub><br>h*ng/mL | AUC <sub>last</sub><br>h*ng/mL | CL<br>mL/h/kg | C <sub>max</sub><br>ng/mL | Half-life<br>h | V <sub>ss</sub><br>mL/kg |
|----------------|------------|-------------------------------|--------------------------------|---------------|---------------------------|----------------|--------------------------|
| Total Ab       | Patient 01 | 42200                         | 36400                          | 2.84          | 1210                      | 61.0           | 216                      |
|                | Patient 02 | 28200                         | 26800                          | 4.25          | 1050                      | 40.3           | 216                      |
|                | Patient 03 | 52600                         | 41100                          | 2.28          | 1520                      | 67.9           | 203                      |
|                | Patient 04 | 15600                         | 14000                          | 7.69          | 674                       | 43.5           | 433                      |
|                | Patient 05 | 35900                         | 34300                          | 3.34          | 1540                      | 45.4           | 171                      |
|                | Patient 06 | 42100                         | 37300                          | 2.85          | 1810                      | 58.2           | 201                      |
|                | Patient 07 | 46300                         | 35600                          | 2.59          | 1180                      | 83.5           | 276                      |
|                | Patient 08 | 35400                         | 33800                          | 3.39          | 1400                      | 43.9           | 180                      |
|                | Patient 09 | 38900                         | 30000                          | 3.09          | 1060                      | 81.5           | 326                      |
|                | Patient 10 | 32700                         | 26100                          | 3.67          | 1000                      | 68.0           | 393                      |
|                | Patient 11 | 65800                         | 51700                          | 1.82          | 1930                      | 93.2           | 207                      |
| N              |            | 11                            | 11                             | 11            | 11                        | 11             | 11                       |
| Mean           |            | 39600                         | 33400                          | 3.44          | 1310                      | 62.4           | 257                      |
| SD             |            | 13000                         | 9530                           | 1.56          | 373                       | 18.2           | 89.3                     |
| CV%            |            | 32.9                          | 28.6                           | 45.3          | 28.5                      | 29.2           | 34.8                     |
| Median         |            | 38900                         | 34300                          | 3.09          | 1210                      | 61.0           | 216                      |
| Range          |            | 50200                         | 37700                          | 5.86          | 1250                      | 52.9           | 262                      |
| Geometric Mean |            | 37400                         | 31900                          | 3.21          | 1260                      | 60.0           | 244                      |

N: number of animals; AUC<sub>inf</sub>: area under the plasma concentration-time curve from start of dosing until infinity; AUC<sub>last</sub>: area under the plasma concentration-time curve from start of dosing until time of last quantifiable concentration; CL: apparent plasma clearance; C<sub>max</sub>: maximum observed plasma concentration; Half-life: terminal elimination half-life; V<sub>ss</sub>: apparent volume of distribution at steady-state

Figure S1. EAD MS<sup>2</sup> spectra of signature z<sub>24</sub>-57 ion of deamidation peptide of MEDI7247 trypsin digestion sample. A) +2 charge ion and B) +1 charge ion.

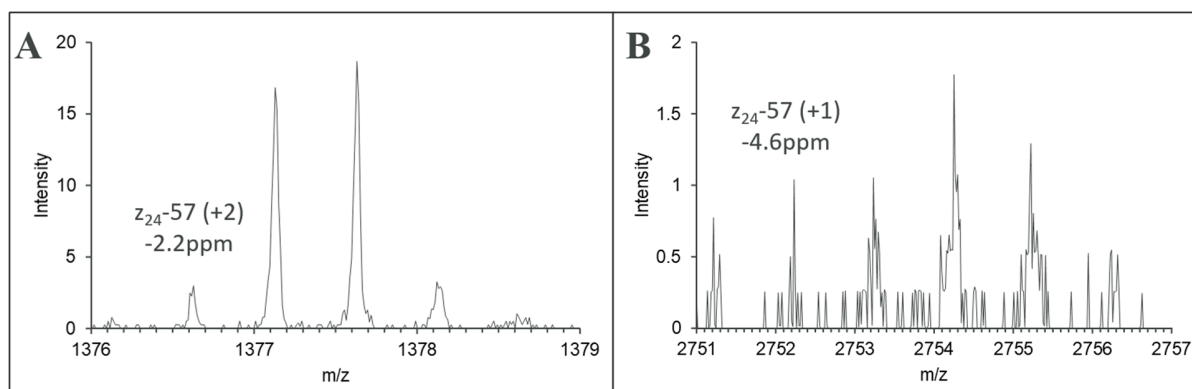

Figure S2. Plasma concentration-time plot for 11 patients

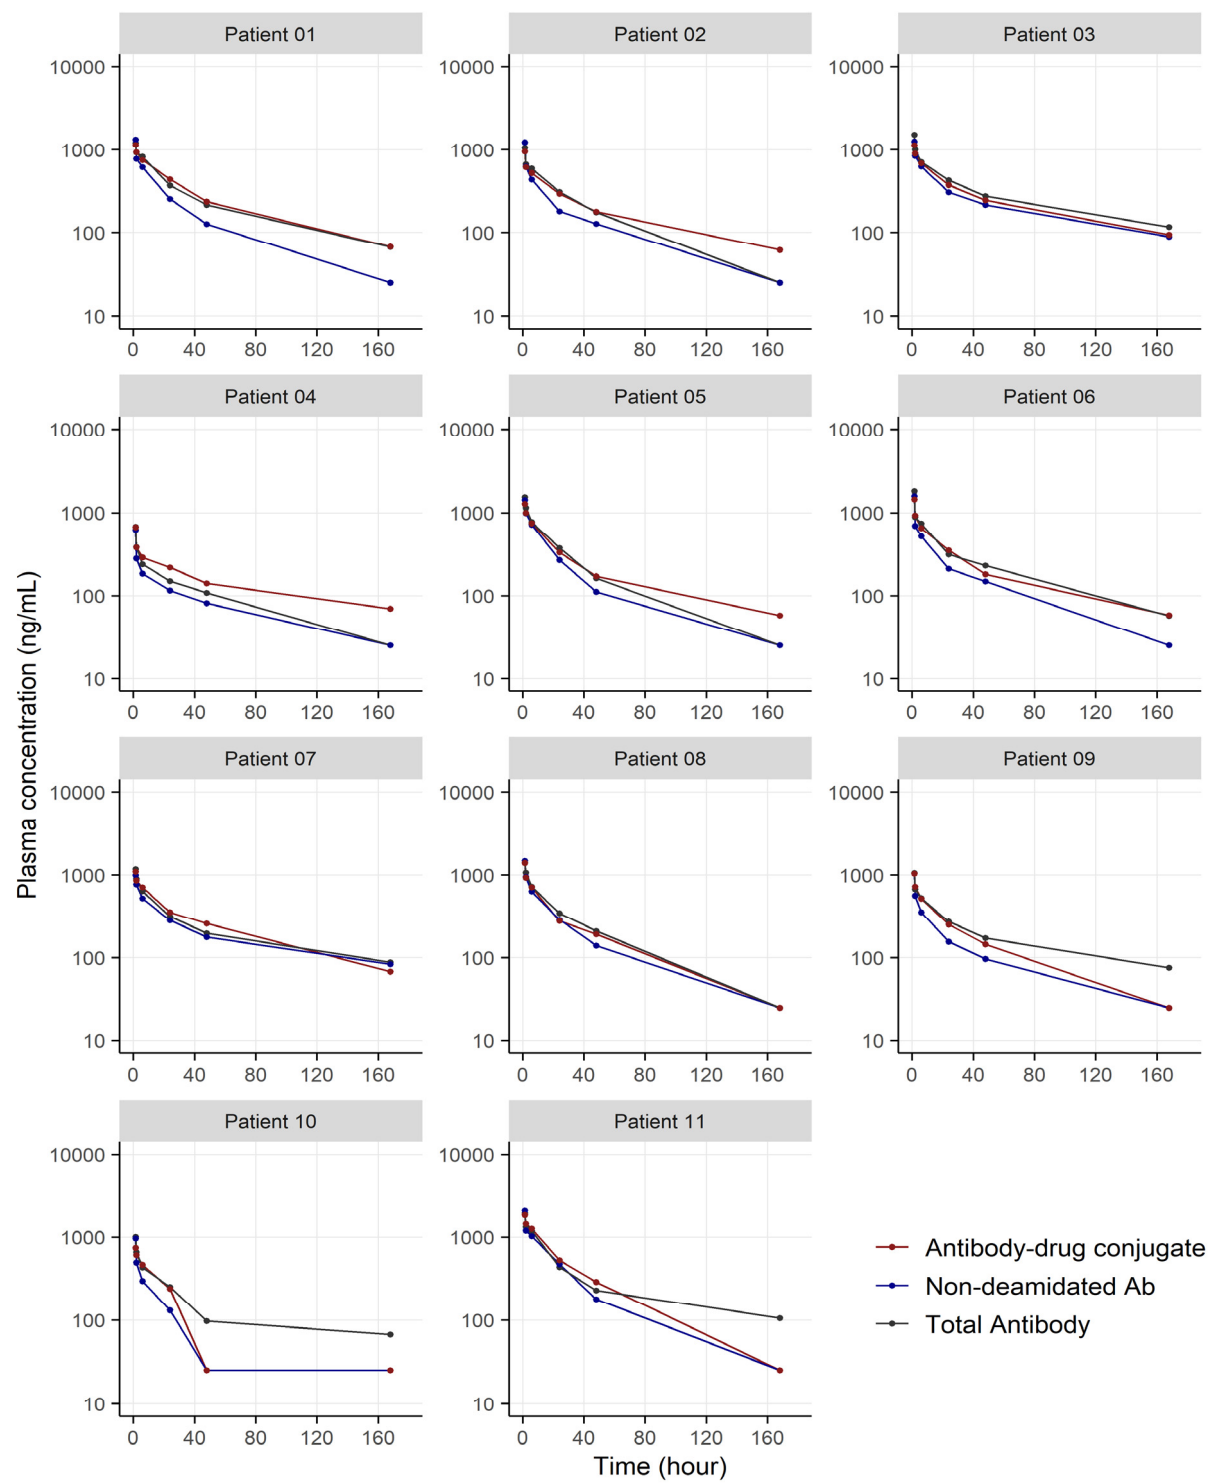

Supplement: s1 [file s1]
